# Supplementary material for: Single-phase alkylammonium cesium lead iodide quasi-2D perovskites for color-tunable and spectrum-stable red LEDs
Source: Royal Society of Chemistry journal article supplement (doi:10.1039/c9nr02706h), 2019-01-01
Supplement: c9nr02706h1.pdf [file c9nr02706h1.pdf]

# Supporting Information

## Single-phase Alkylammonium Cesium Lead Iodide Quasi-2D Perovskite for Color-tunable and Spectrum-stable Red LEDs

Hong Lin<sup>1,†</sup>, Jian Mao<sup>1,†</sup>, Minchao Qin<sup>2</sup>, Zhilong Song<sup>3</sup>, Wanjian Yin<sup>3</sup>, Xinhui Lu<sup>2</sup>, Wallace C.H. Choy<sup>1,\*</sup>

<sup>1</sup>Department of Electrical and Electronic Engineering, The University of Hong Kong, Pokfulam Road, Hong Kong SAR, China.

<sup>2</sup>Department of Physics, The Chinese University of Hong Kong, Shatin, Hong Kong SAR, China.

<sup>3</sup>Soochow Institute for Energy and Materials InnovationS (SIEMIS), College of Physics, Optoelectronics and Energy & Collaborative Innovation Center of Suzhou Nano Science and Technology, Soochow University, Suzhou 215006, China.

† equally contributed.

\*corresponding author: chchoy@eee.hku.hk

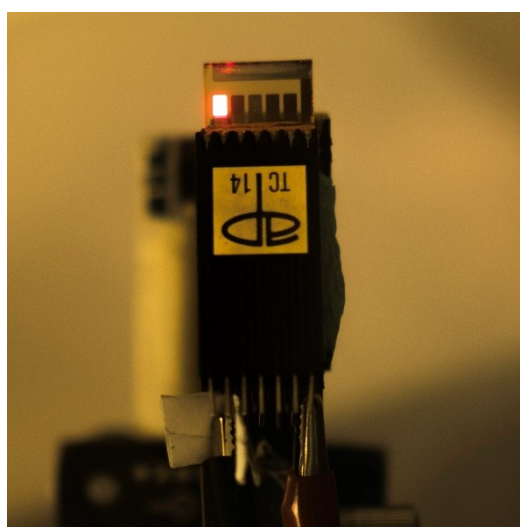

**Figure S1.** Photograph of  $\text{PA}_2\text{CsPb}_2\text{I}_7$  PeLED (100 °C) under operation.

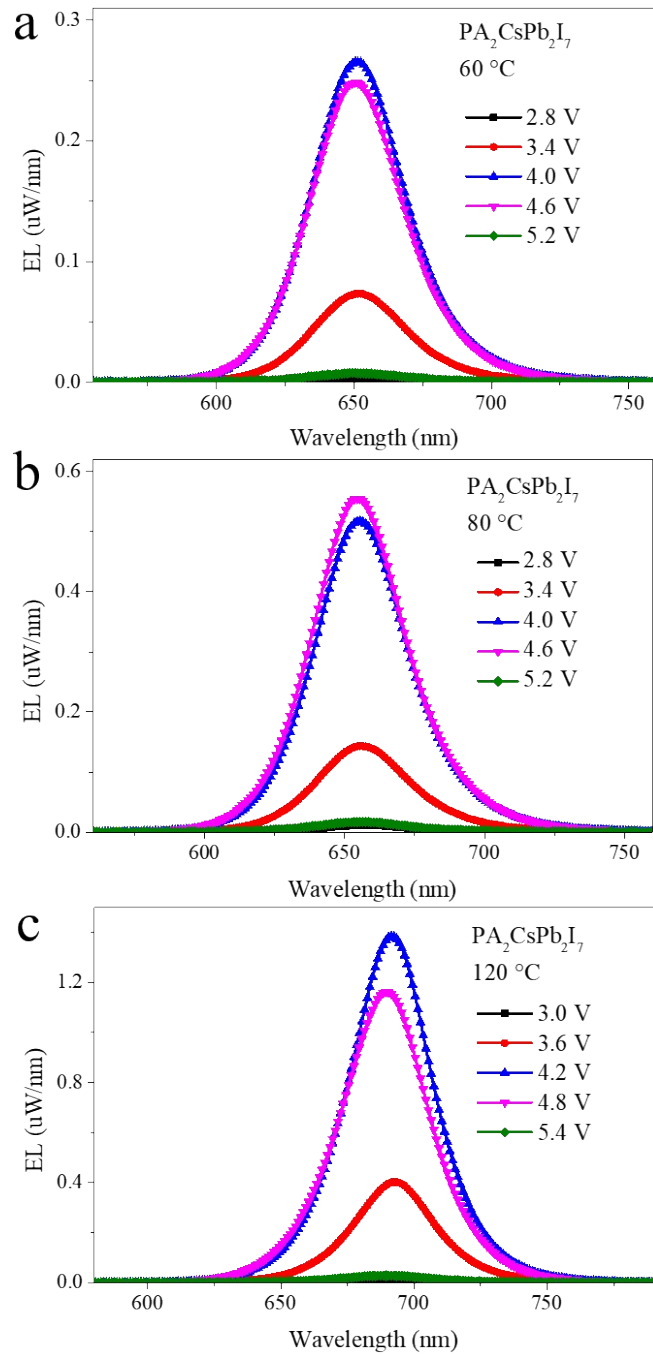

**Figure S2.** Voltage-dependent EL spectra of  $\text{PA}_2\text{CsPb}_2\text{I}_7$  PeLEDs annealed at a) 60 °C, b) 80 °C, and c) 120 °C.

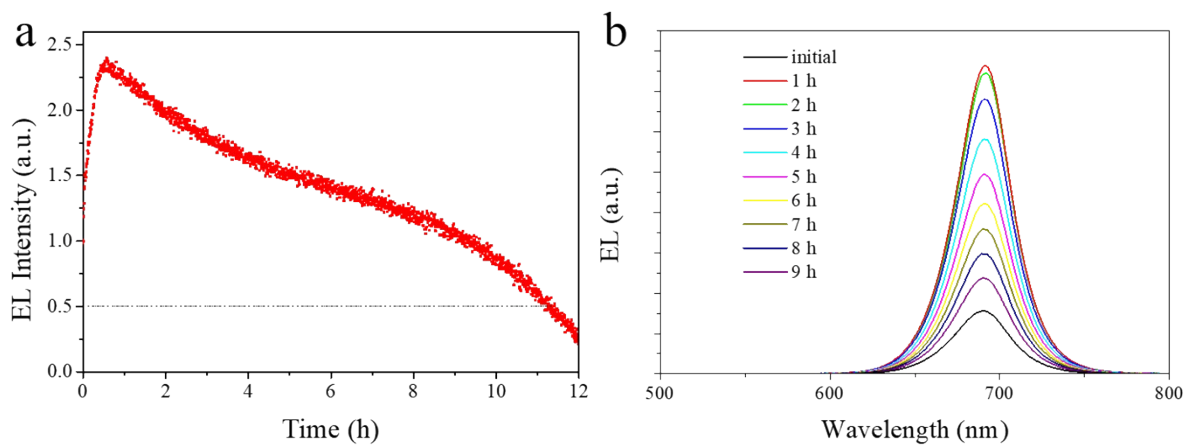

**Figure S3.** Device stability test of PA<sub>2</sub>CsPb<sub>2</sub>I<sub>7</sub> PeLEDs annealed 120 °C: a) EL intensity ( $I/I_0$ ) against time; b) EL spectrum measured at different operation time. Measurement was carried out at a fix current density of 10 mA/cm<sup>2</sup> in glove box without encapsulation.

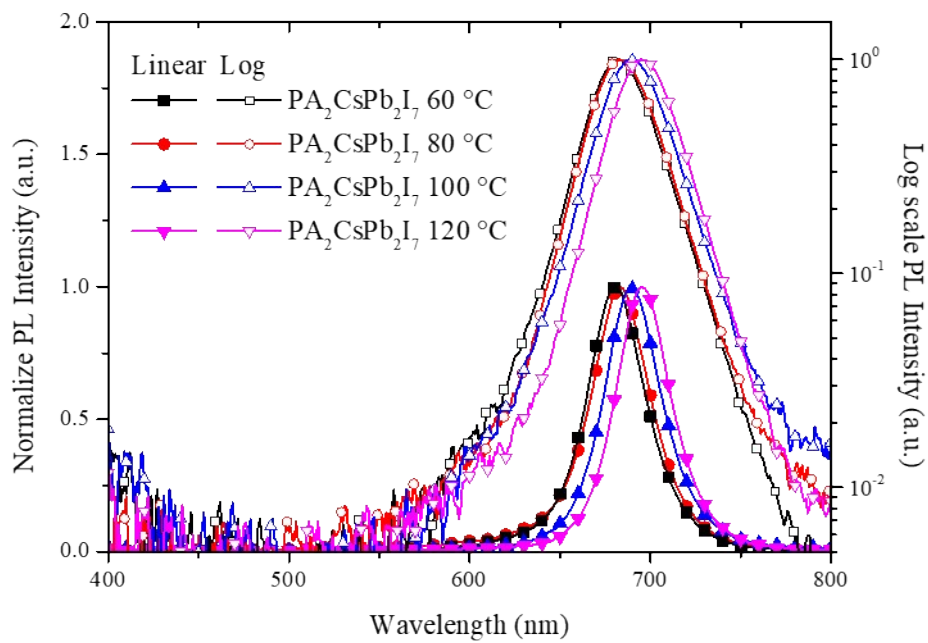

**Figure S4.** PL of  $\text{PA}_2\text{CsPb}_2\text{I}_7$  thin films in linear and log scale.

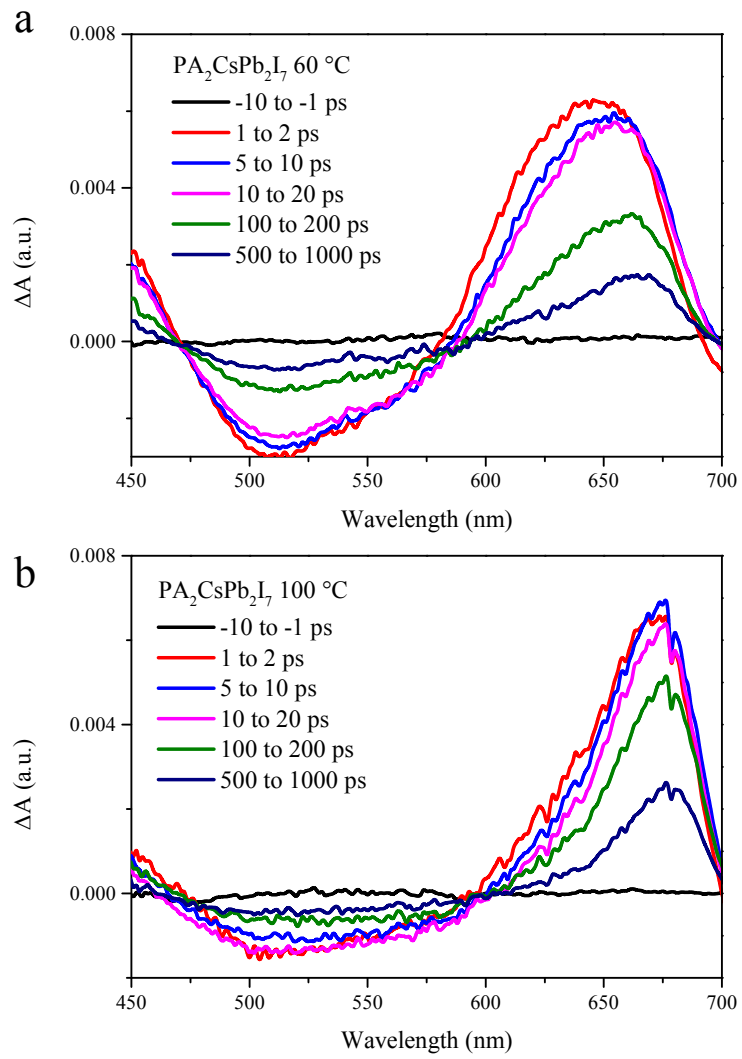

**Figure S5.** TA spectra of  $\text{PA}_2\text{CsPb}_2\text{I}_7$  thin films annealed at 60 and 100  $^\circ\text{C}$ .

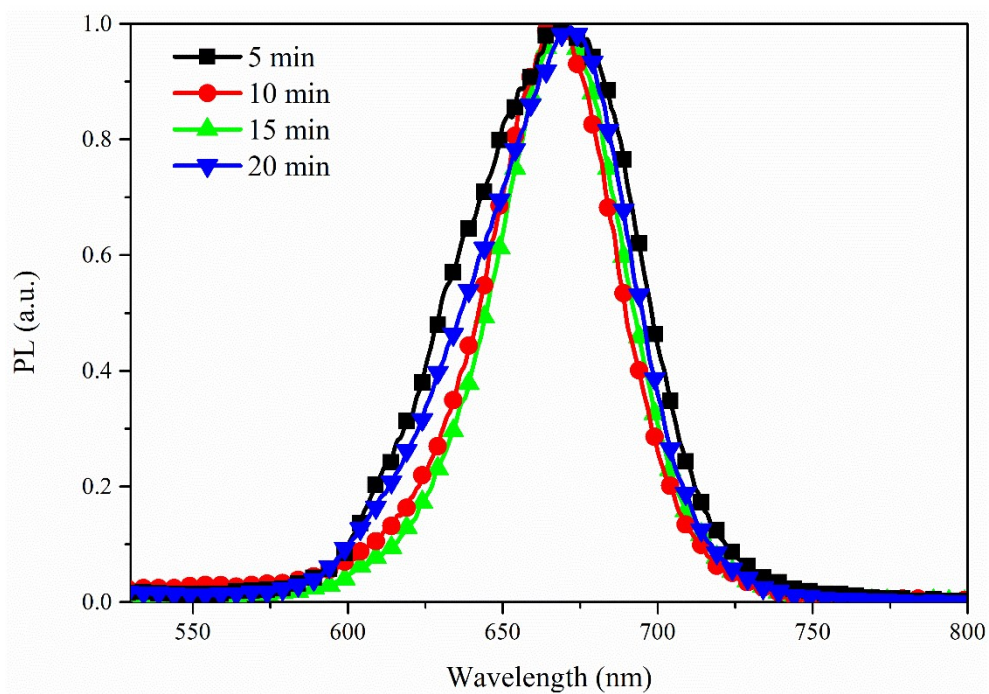

**Figure S6.** PL spectra of PA<sub>2</sub>CsPb<sub>2</sub>I<sub>7</sub> PeLEDs annealed 100 °C with different annealing times.

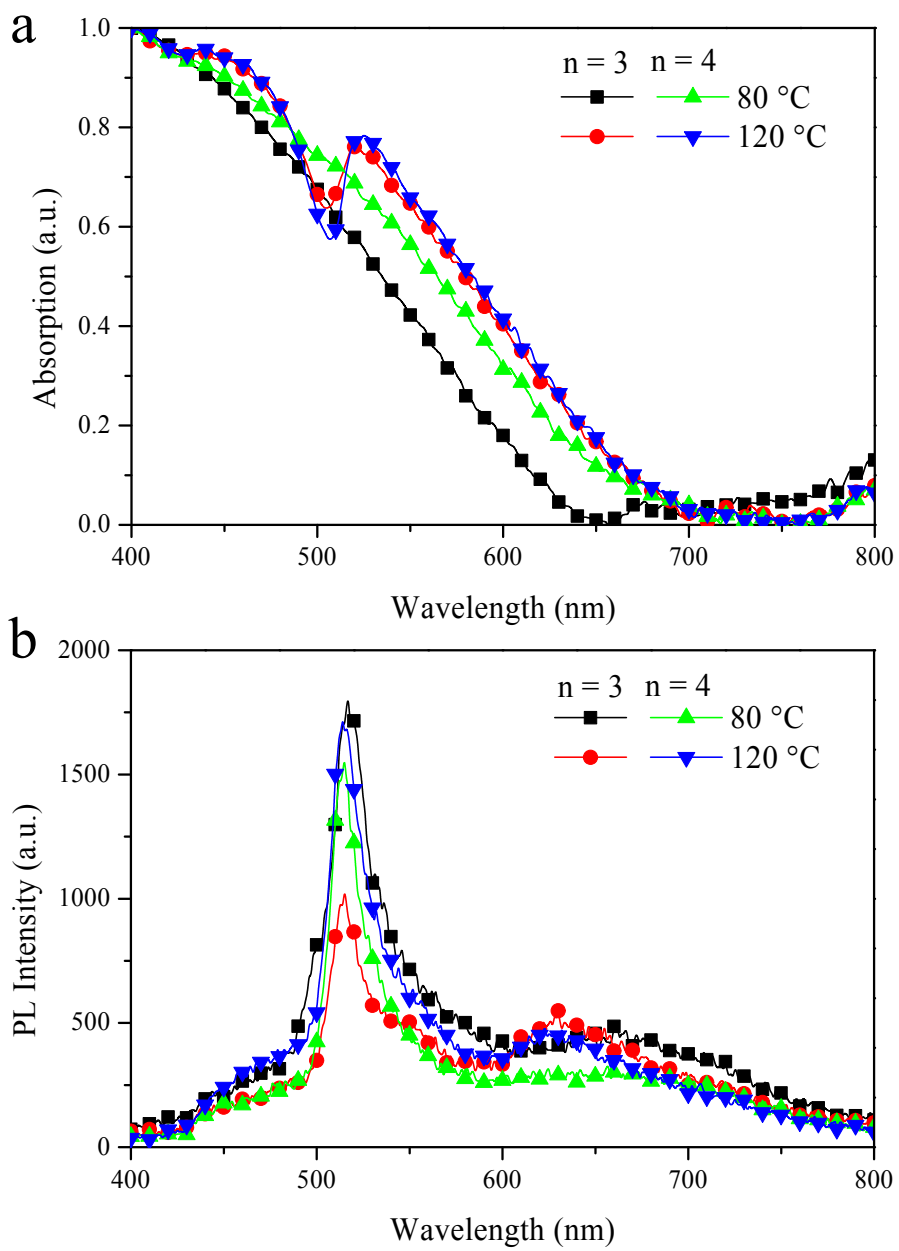

**Figure S7.** Absorption (a) and PL (b) spectra of  $\text{PA}_2\text{CS}_2\text{Pb}_3\text{I}_{10}$  ( $n = 3$ ) and  $\text{PA}_2\text{CS}_3\text{Pb}_4\text{I}_{13}$  ( $n = 4$ ) thin films.

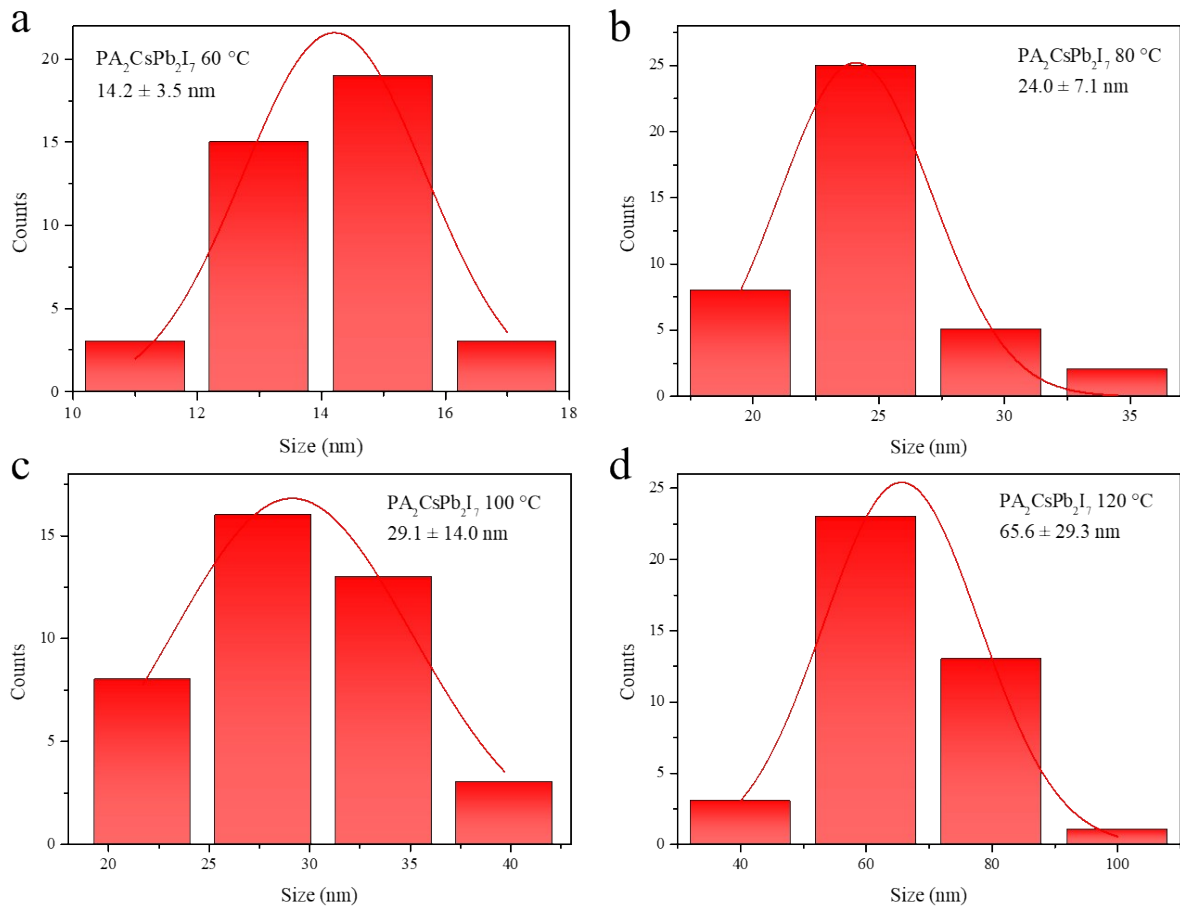

**Figure S8.** Histograms of grain size distribution for  $\text{PA}_2\text{CsPb}_2\text{I}_7$  thin films annealed at 60 °C, 80 °C, 100 °C, and 120 °C, respectively. The grain size was measured by the grain edge length in the SEM images.



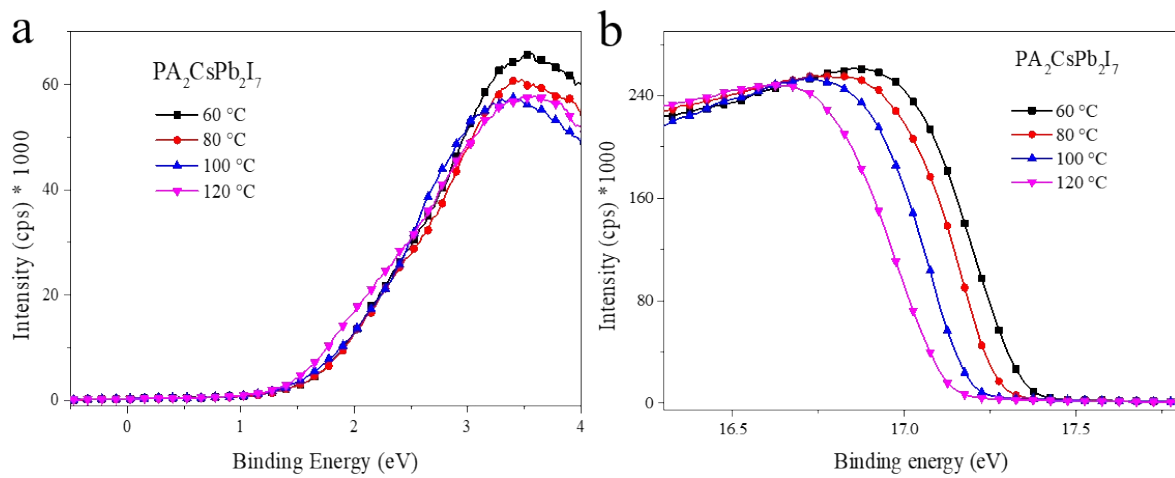

**Figure S9.** Ultraviolet photoelectron spectroscopy (UPS) results of  $\text{PA}_2\text{CsPb}_2\text{I}_7$  thin films (60 °C, 80 °C, 100 °C, and 120 °C) on ITO substrate. Valance band maximum of  $\text{PA}_2\text{CsPb}_2\text{I}_7$  gradually reduced with increased annealing temperature.

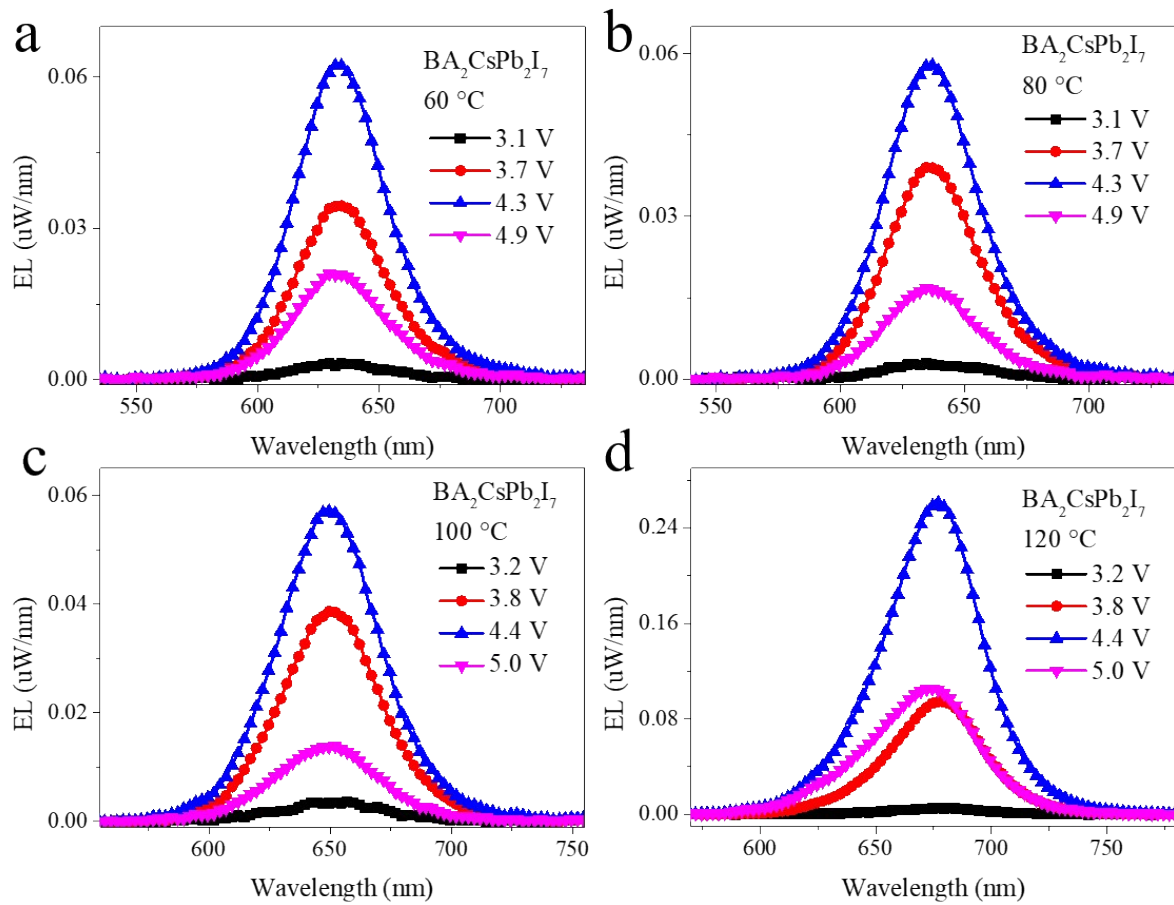

**Figure S10.** Voltage-dependent EL spectra of  $\text{BA}_2\text{CsPb}_2\text{I}_7$  PeLEDs (60 °C (a), 80 °C (b), 100 °C (c), and 120 °C (d)).

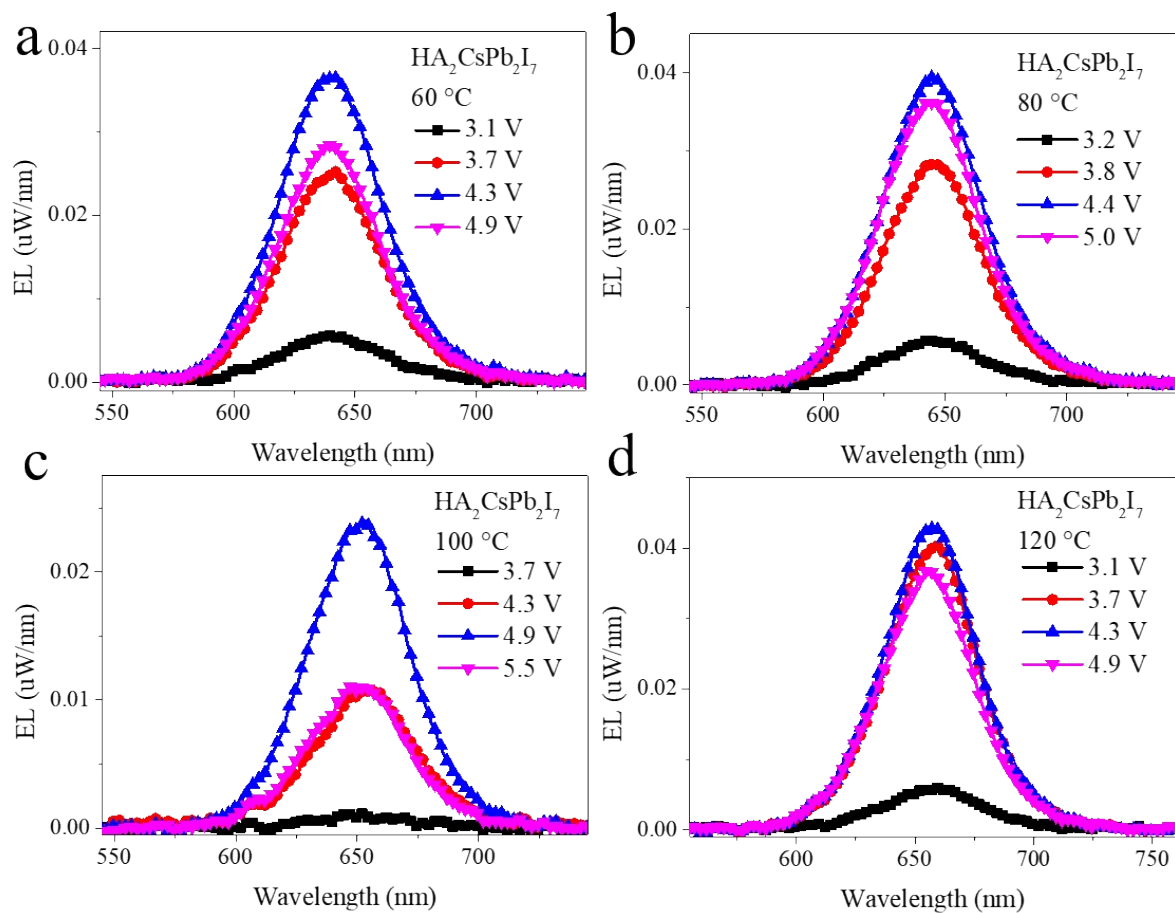

**Figure S11.** Voltage-dependent EL spectra of  $\text{HA}_2\text{CsPb}_2\text{I}_7$  PeLEDs (60 °C (a), 80 °C (b), 100 °C (c), and 120 °C (d)).

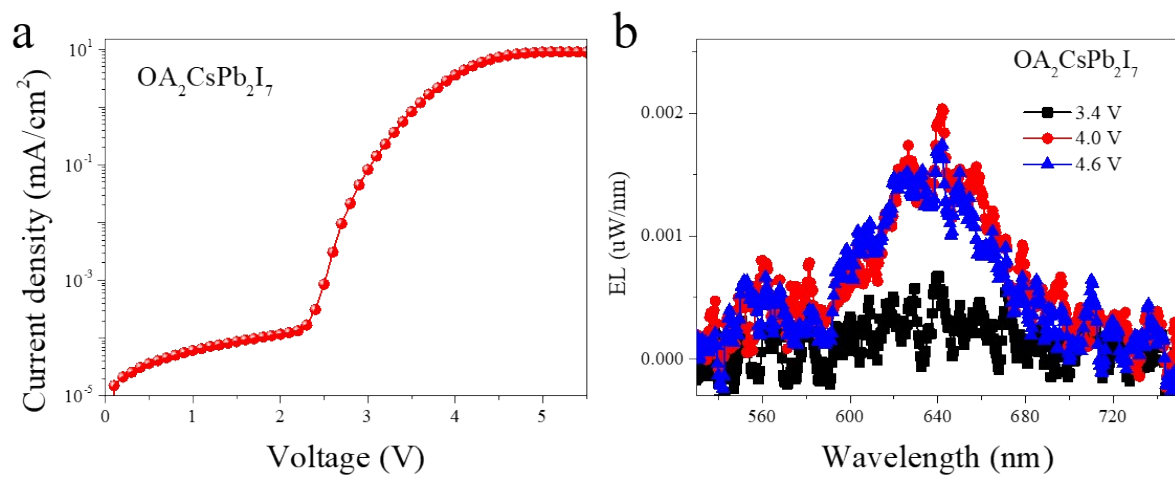

**Figure S12.** a) Current density-voltage curve and b) EL spectra of  $(\text{C}_6\text{H}_{13}\text{NH}_3)_2\text{CsPb}_2\text{I}_7$  ( $\text{OA}_2\text{CsPb}_2\text{I}_7$ ) PeLEDs.
